# Supplementary material for: Novel triazole-based fluorescent probes for Pd2+ in aqueous solutions: design, theoretical calculations and imaging
Source: Royal Society of Chemistry journal article supplement (doi:10.1039/c3an01183f), 2013-01-01

# Novel Triazole-Based Fluorescent Probe for Pd<sup>2+</sup> in Aqueous

## Solutions: Design, Theoretical Calculations and Imaging

Ji-Ting Hou, Kun Li,\* Kang-Kang Yu, Mei-Zhen Ao, Xin Wang, and Xiao-Qi Yu\*

E-mail: kli@scu.edu.cn; xqyu@scu.edu.cn

|                                          |      |
|------------------------------------------|------|
| Figure S1                                | 2    |
| Figure S2                                | 2    |
| Figure S3                                | 3    |
| Figure S4                                | 3    |
| Figure S5                                | 4    |
| Figure S6                                | 4    |
| Figure S7                                | 5    |
| Figure S8                                | 5    |
| Figure S9                                | 6    |
| Figure S10                               | 6    |
| Figure S11                               | 7    |
| Figure S12                               | 7    |
| Figure S13                               | 8    |
| Table S1                                 | 8    |
| Table S2                                 | 8    |
| NMR and HRMS copies of various compounds | 9-23 |

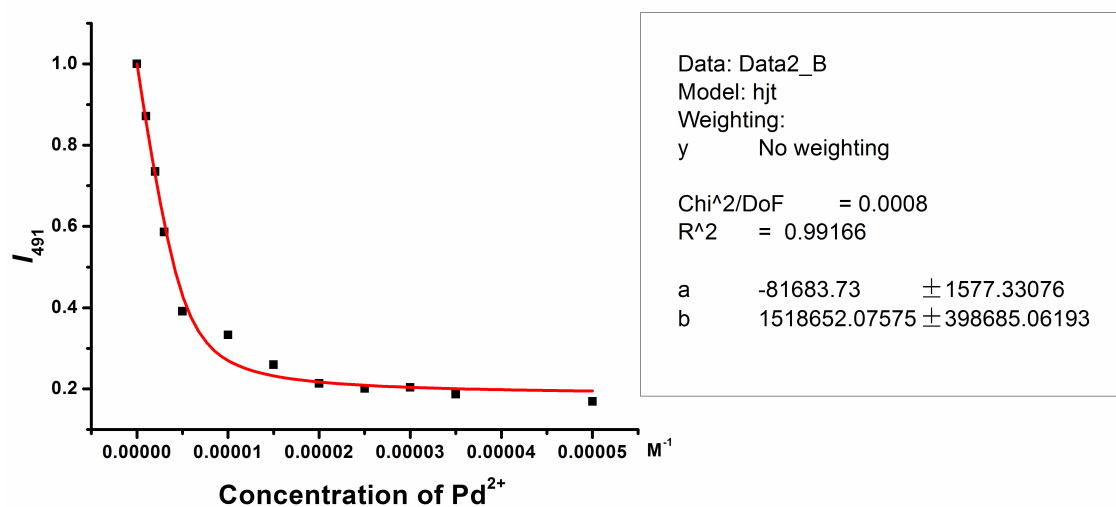

Figure S1 Nonlinear least square analysis of PS-1 and  $\text{Pd}^{2+}$ .

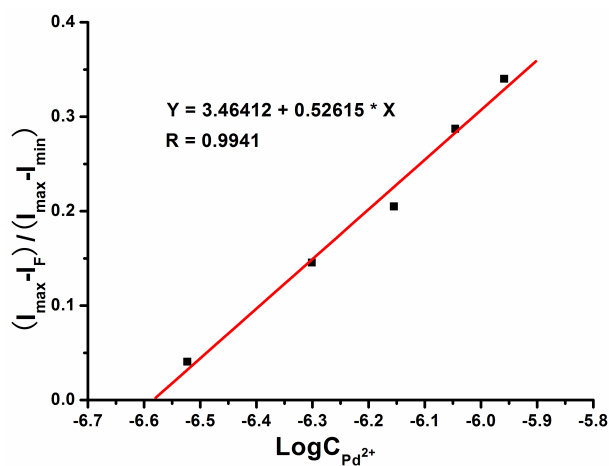

Figure S2 Normalized response of fluorescence signal to changing  $\text{Pd}^{2+}$  concentrations in the PBS buffer (10 mM, pH = 7.2, containing 0.5% DMF). ( $\lambda_{\text{ex}} = 410 \text{ nm}$ ,  $\lambda_{\text{em}} = 491 \text{ nm}$ ).

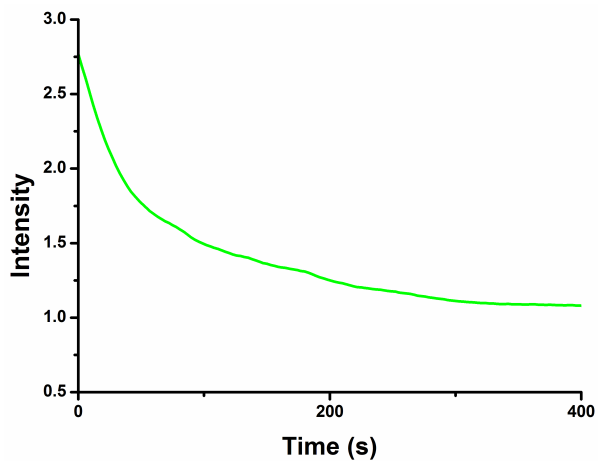

**Figure S3** Time-dependent fluorescence intensity changes at 491 nm of **PS-1** (5  $\mu\text{M}$ ) with  $\text{Pd}^{2+}$  (5  $\mu\text{M}$ )

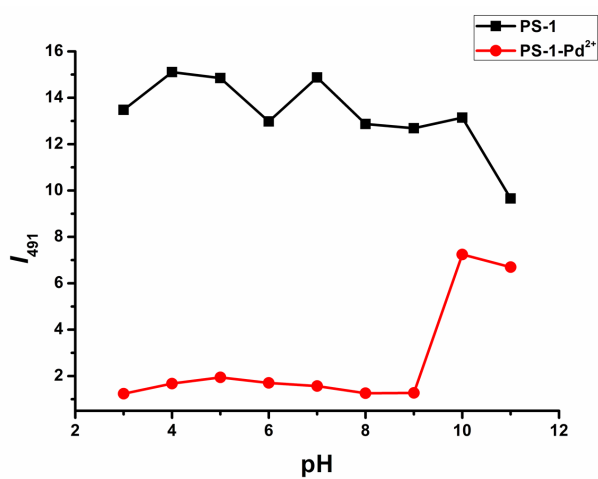

**Figure S4** pH titration of **PS-1** (5  $\mu\text{M}$ ) with or without  $\text{Pd}^{2+}$  (50  $\mu\text{M}$ ) during pH 3.0-11.0.

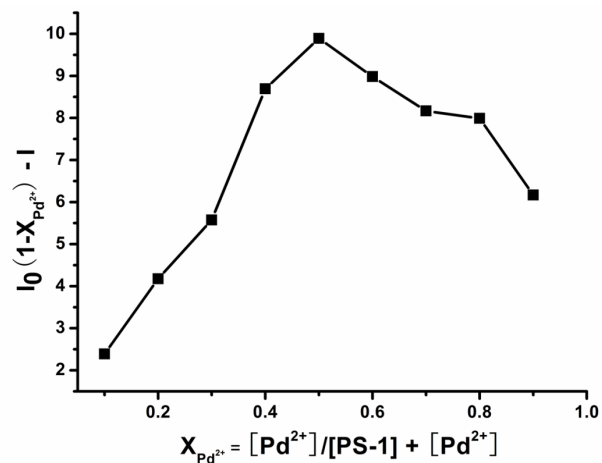

Figure S5 The job plot of a 1:1 complex of PS-1 with  $Pd^{2+}$ .

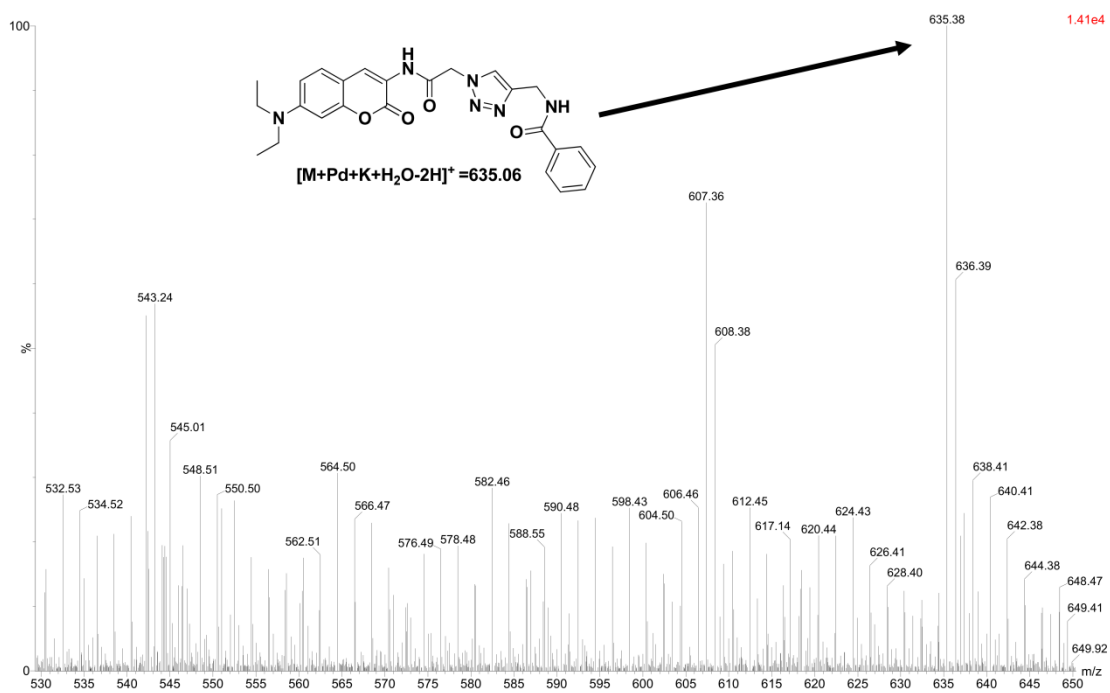

Figure S6 ESI-Mass of complex of PS-1 with  $Pd^{2+}$ .

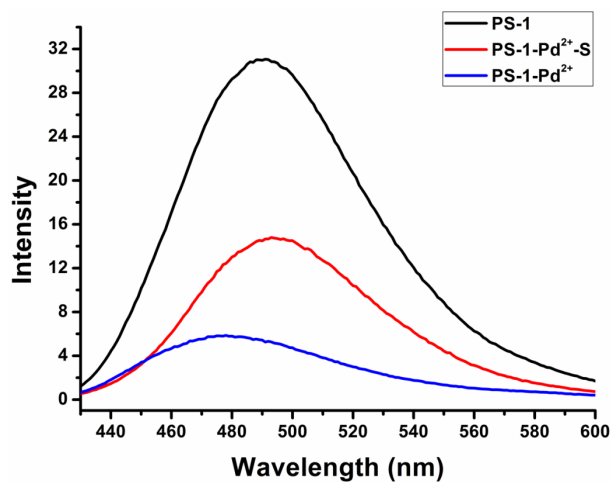

**Figure S7** Fluorescence spectral changes of PS-1-Pd<sup>2+</sup> solution upon addition of an excess amount of S<sup>2-</sup> ion.

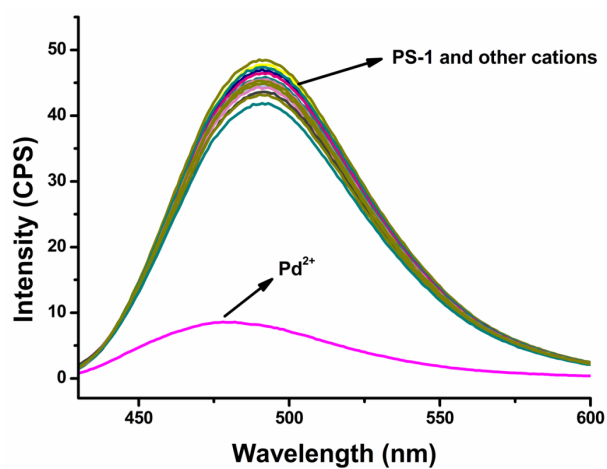

**Figure S8** Fluorescent spectra of compound PS-1 (5 μM) upon addition of 10 equiv metal ions in PBS buffer (10 mM, pH = 7.2, containing 0.5% DMF). ( $\lambda_{\text{ex}}$  = 410 nm, slit = 3.0 nm/3.0 nm)

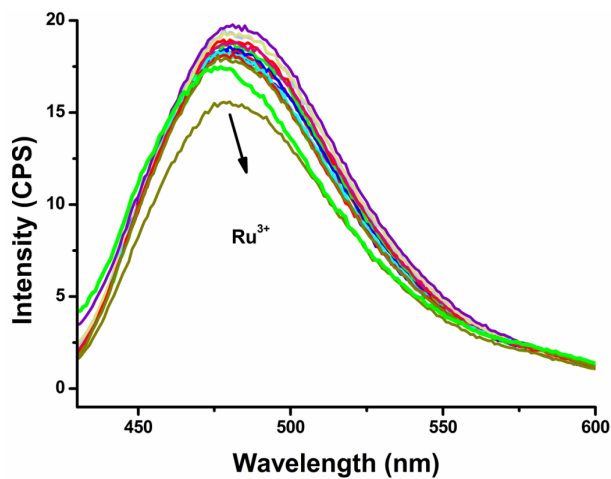

**Figure S9** Fluorescence response of PS-1 (50  $\mu\text{M}$ ) to various metal ions (10 equiv) in the presence of Pd<sup>2+</sup> (10 equiv) PBS buffer (10 mM, pH = 7.2, containing 0.5% DMF). ( $\lambda_{\text{ex}}$  = 410 nm, slit = 3.0 nm/3.0 nm).

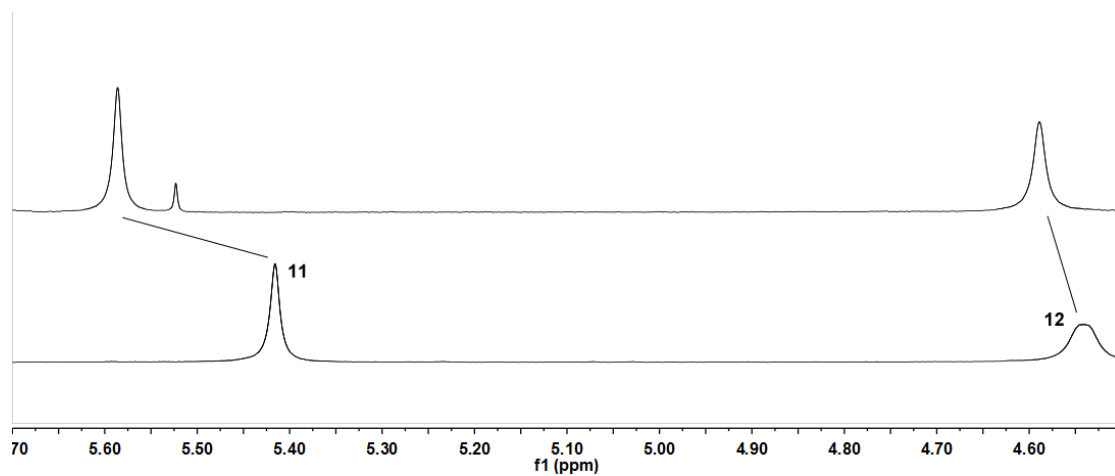

**Figure S10** Partial <sup>1</sup>H NMR spectra of PS-1 in the absence or presence of 3 equiv Pd<sup>2+</sup> in DMSO-*d*<sub>6</sub> (Alkyl area). (top : PS-1 with Pd<sup>2+</sup>; bottom: PS-1)

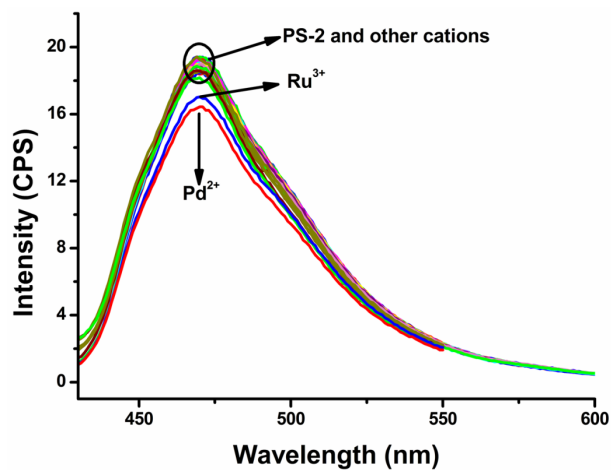

**Figure S11** Fluorescent spectra of compound PS-2 (5 μM) upon addition of 10 equiv metal ions in PBS buffer (10 mM, pH = 7.2, containing 0.5% DMF). ( $\lambda_{\text{ex}} = 410$  nm, slit = 3.0 nm/3.0 nm)

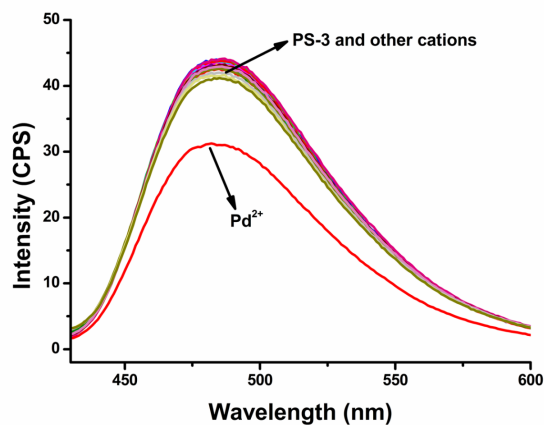

**Figure S12** Fluorescent spectra of compound PS-3 (5 μM) upon addition of 10 equiv metal ions in PBS buffer (10 mM, pH = 7.2, containing 0.5% DMF). ( $\lambda_{\text{ex}} = 410$  nm, slit = 3.0 nm/3.0 nm)

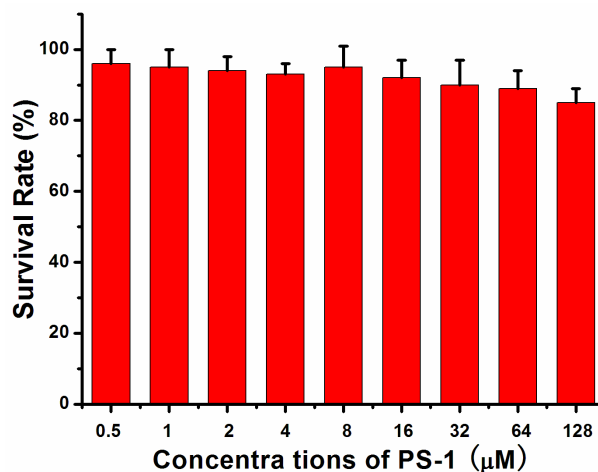

**Figure S13** Effects of PS-1 at varied concentrations on the viability of HeLa cells. The results are the mean standard deviation of three separate measurements.

**Table S1** Quantum yields of PS-1/2/3 with or without Pd<sup>2+</sup>.

| Species               | $\Phi_F$ |
|-----------------------|----------|
| PS-1                  | 0.077    |
| PS-1-Pd <sup>2+</sup> | 0.015    |
| PS-2                  | 0.045    |
| PS-2-Pd <sup>2+</sup> | 0.039    |
| PS-3                  | 0.021    |
| PS-3-Pd <sup>2+</sup> | 0.017    |

**Table S2** B3LYP optimized bond distances (Å) of PS-1/2/3 with Pd<sup>2+</sup>.

| Bond  | Bond lengths (Å) |              |              |
|-------|------------------|--------------|--------------|
|       | PS-1-Pd          | PS-2-Pd      | PS-3-Pd      |
| Pd-N1 | <b>2.016</b>     | <b>2.011</b> | 4.267        |
| Pd-N2 | 2.871            | 2.946        | 2.918        |
| Pd-N3 | 3.442            | <b>2.064</b> | 3.525        |
| Pd-N4 | 3.287            | 2.965        | 3.433        |
| Pd-C1 | 2.534            | 4.059        | 2.702        |
| Pd-C2 | <b>2.181</b>     | 4.053        | <b>2.23</b>  |
| Pd-O1 | 4.207            | 4.066        | <b>2.095</b> |
| Pd-N5 | <b>2.095</b>     |              | 3.515        |
| Pd-O2 | 3.166            |              | <b>2.069</b> |



$^1\text{H-NMR}$  Spectrum of **A-1** in  $\text{CDCl}_3$  (400 MHz):

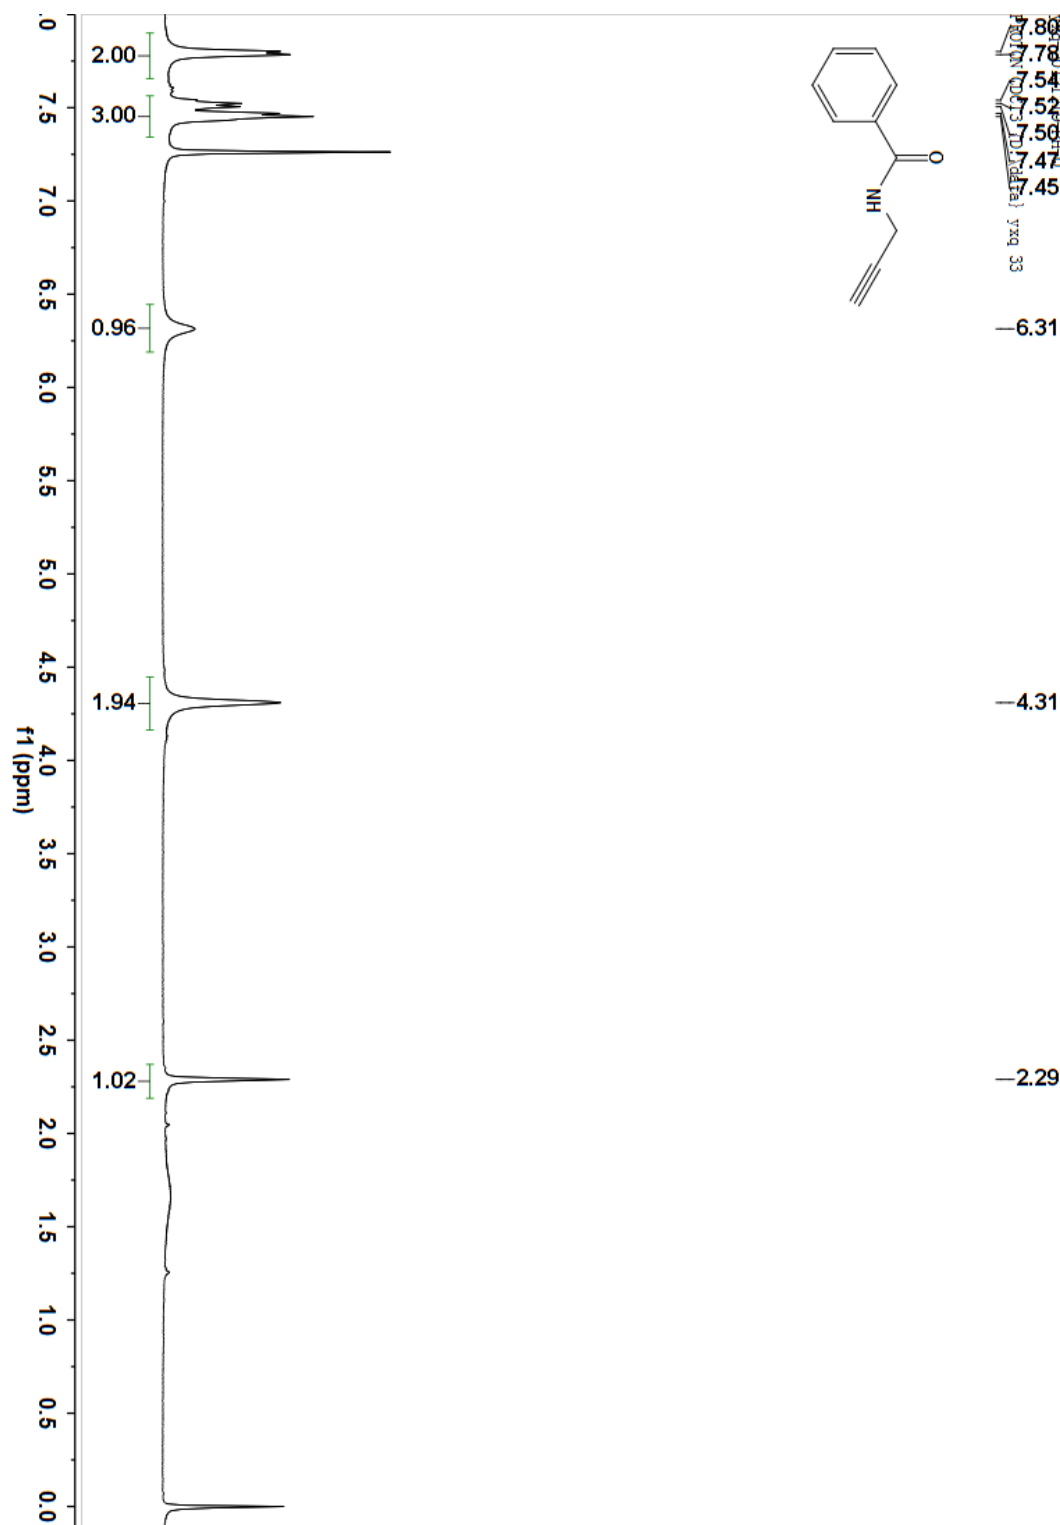

$^1\text{H-NMR}$  Spectrum of C-2 in  $\text{CDCl}_3$  (400 MHz):

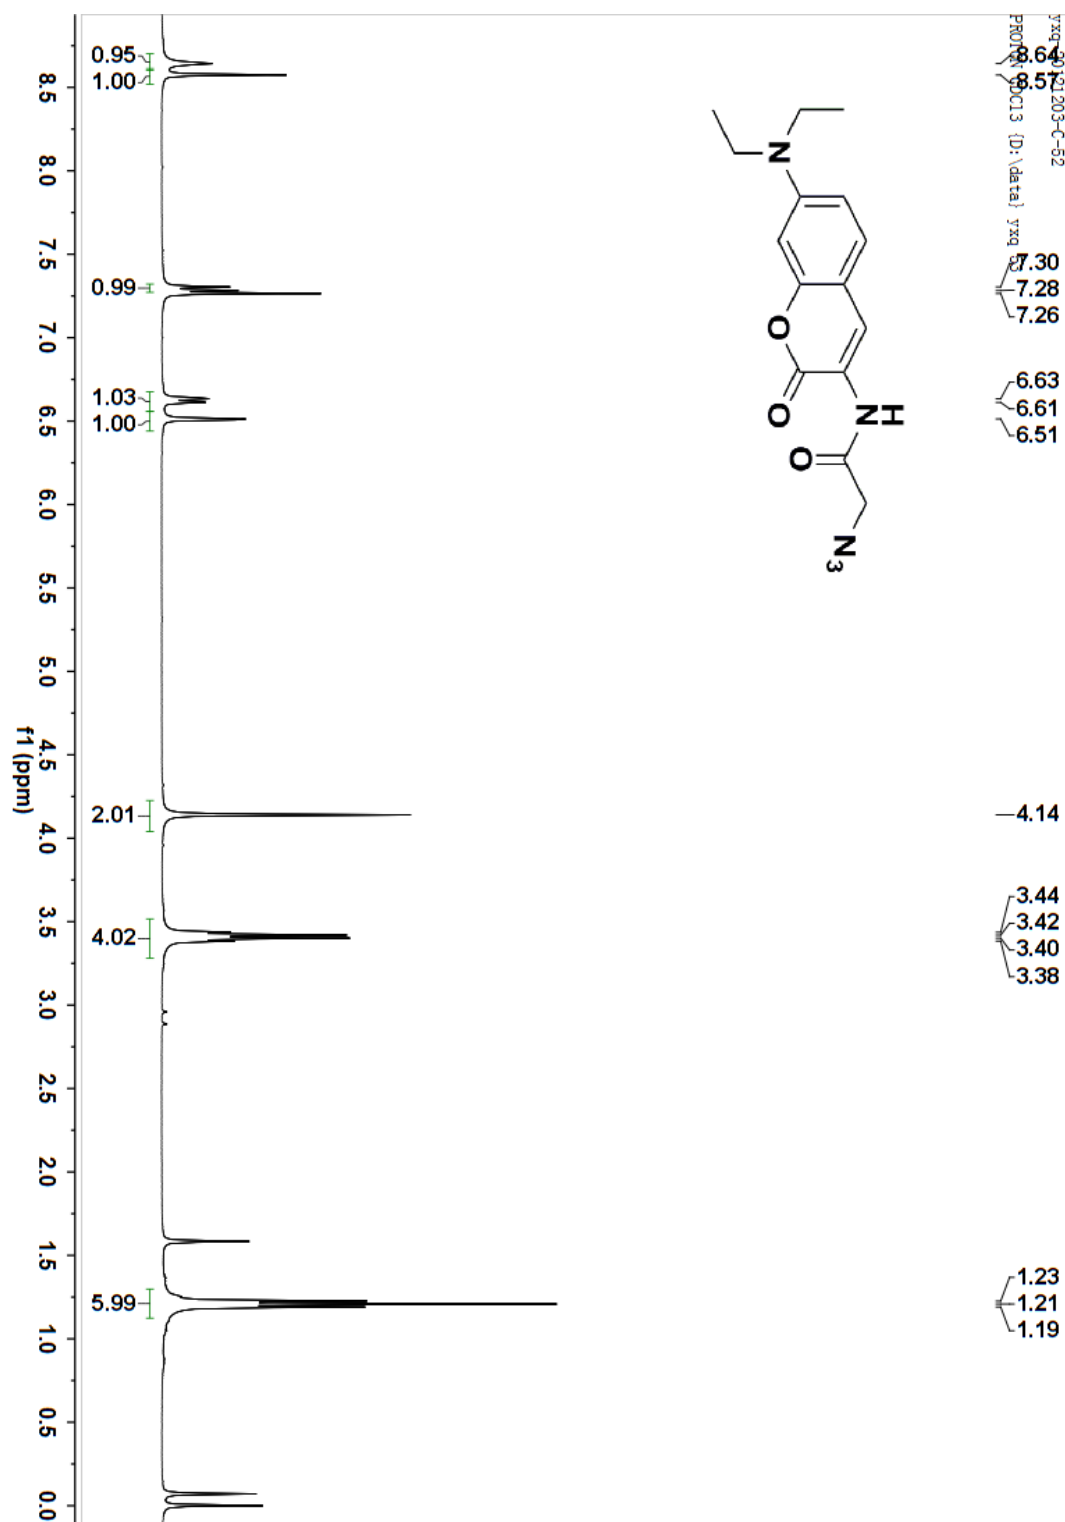

$^{13}\text{C}$ -NMR Spectrum of C-2 in  $\text{CDCl}_3$  (100 MHz):

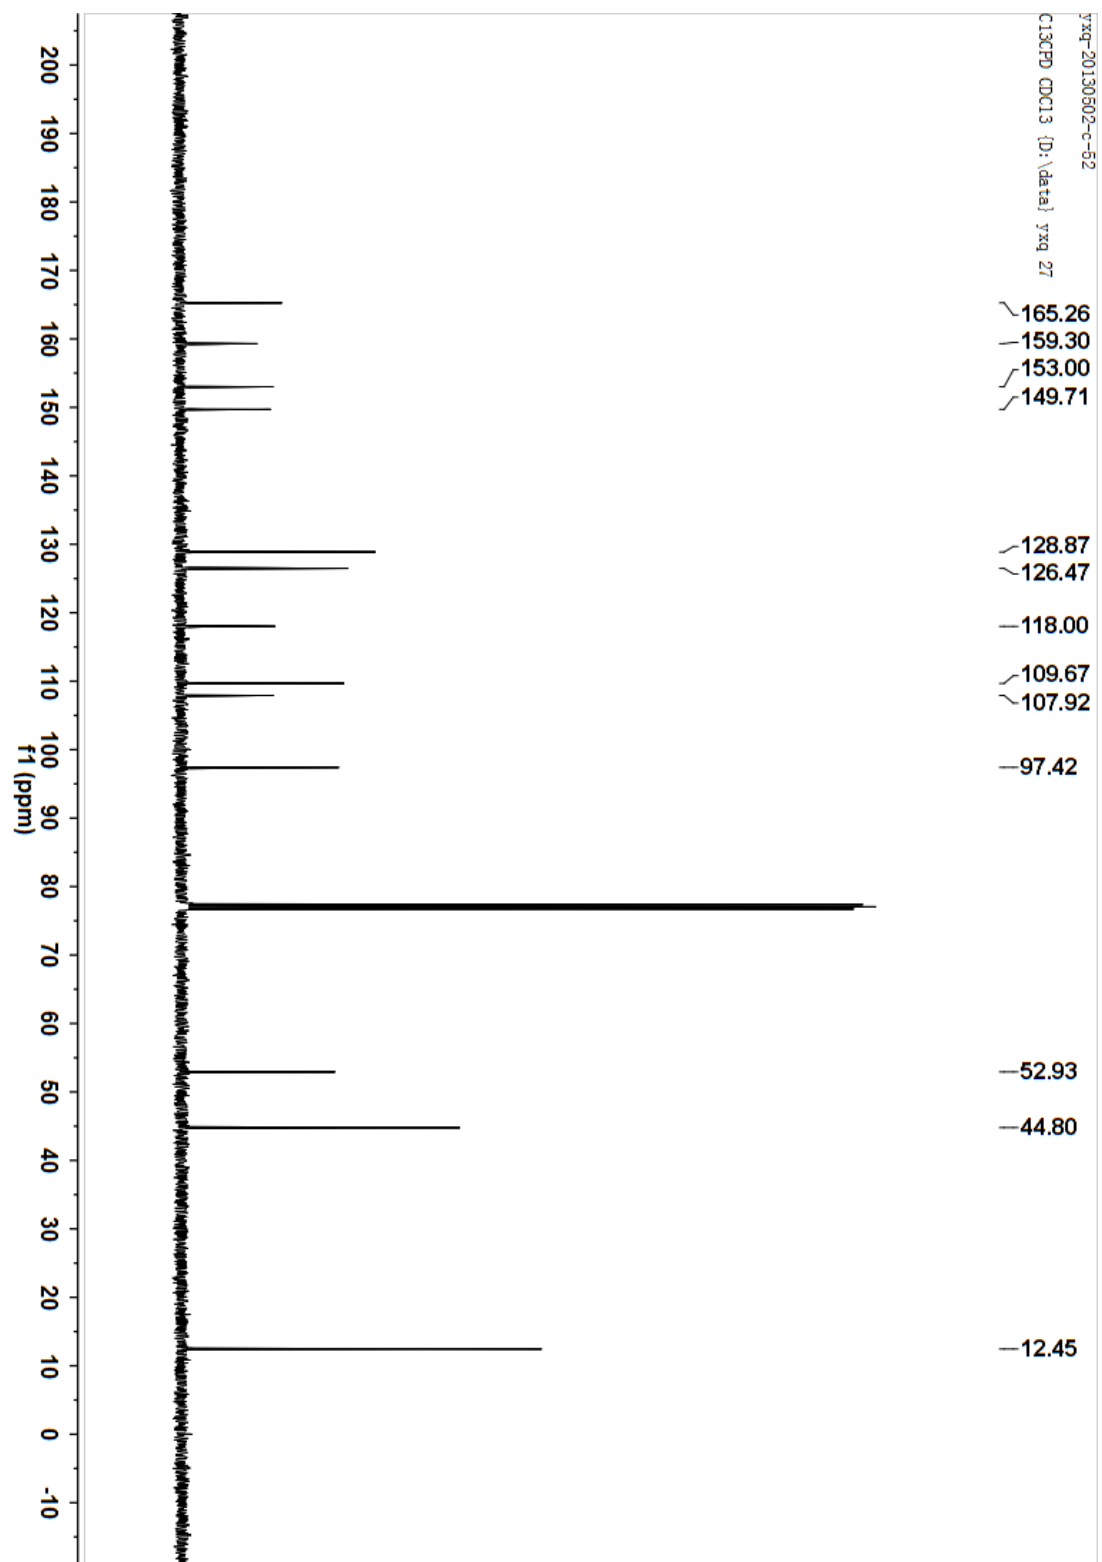

<sup>1</sup>H-NMR Spectrum of PS-1 in DMSO-*d*<sub>6</sub> (400 MHz):

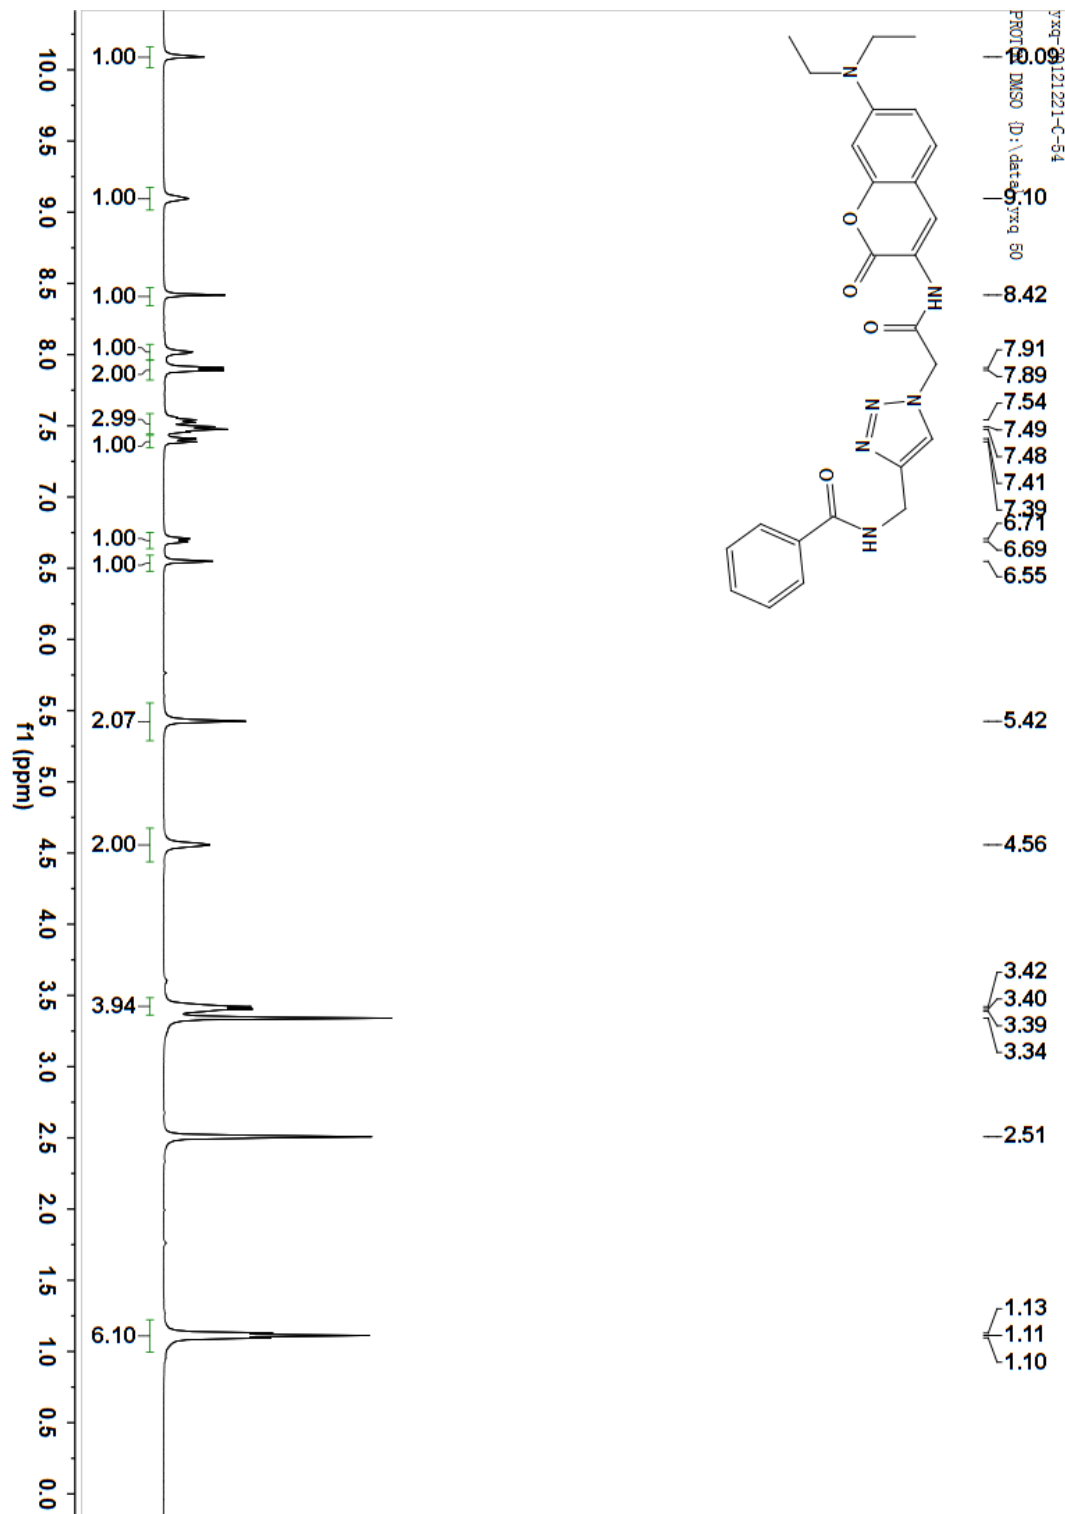

$^{13}\text{C}$ -NMR Spectrum of PS-1 in  $\text{DMSO-}d_6$  (100 MHz):

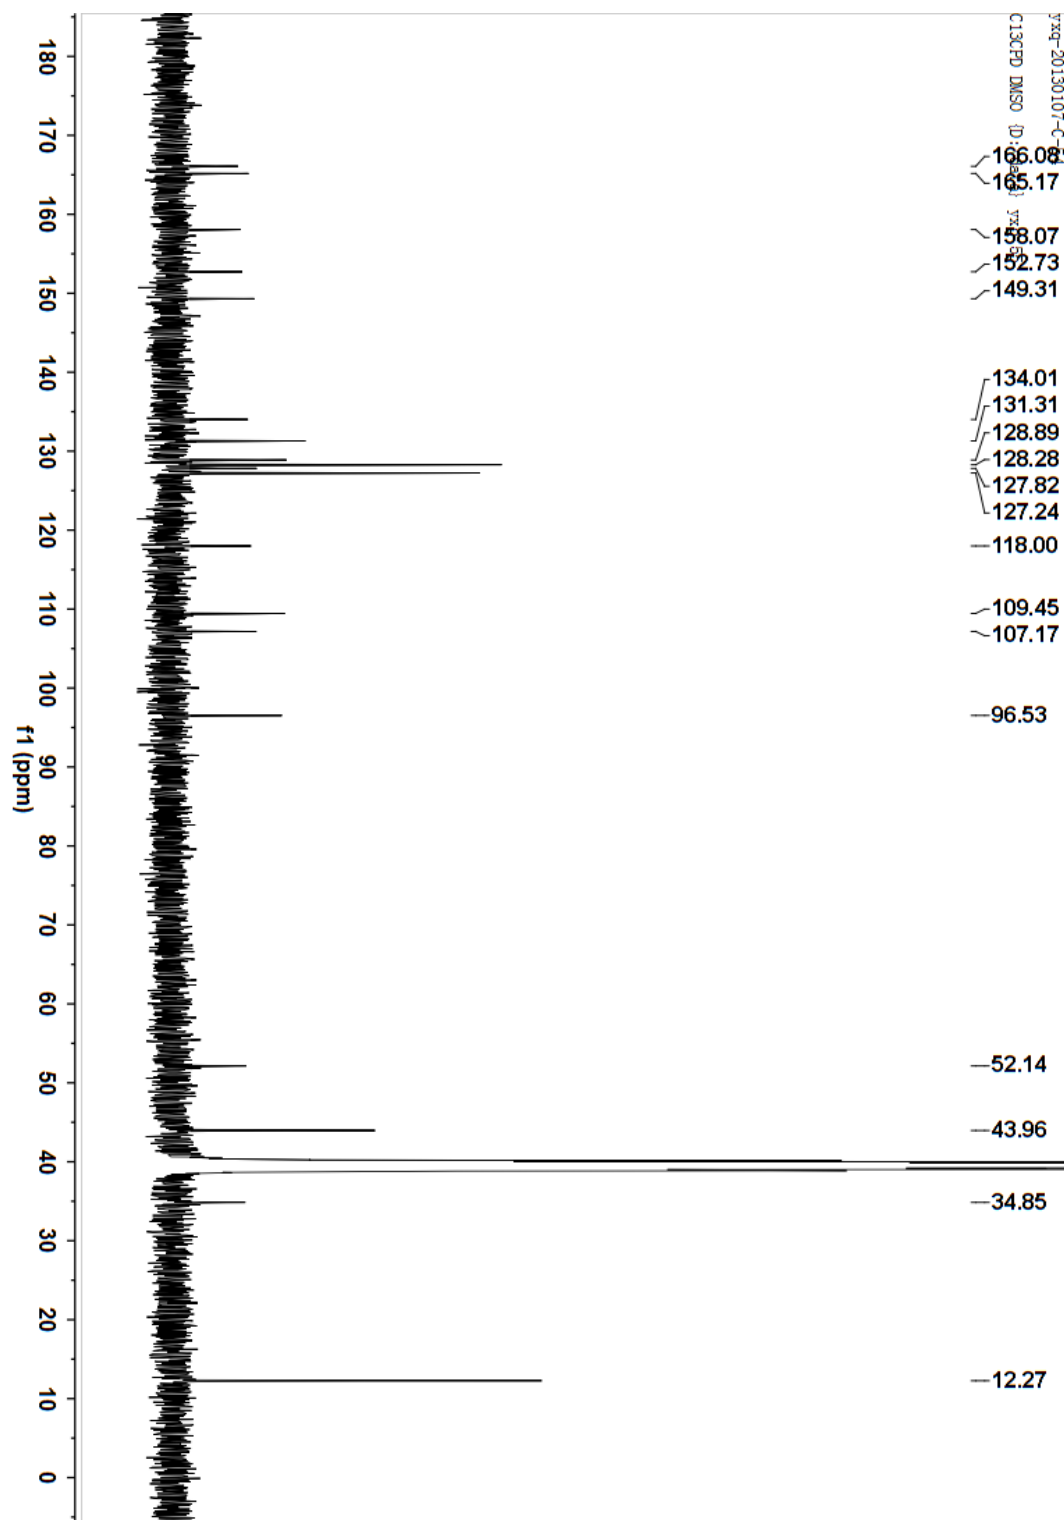

$^1\text{H-NMR}$  Spectrum of **PS-2** in  $\text{DMSO-}d_6$  (400 MHz):

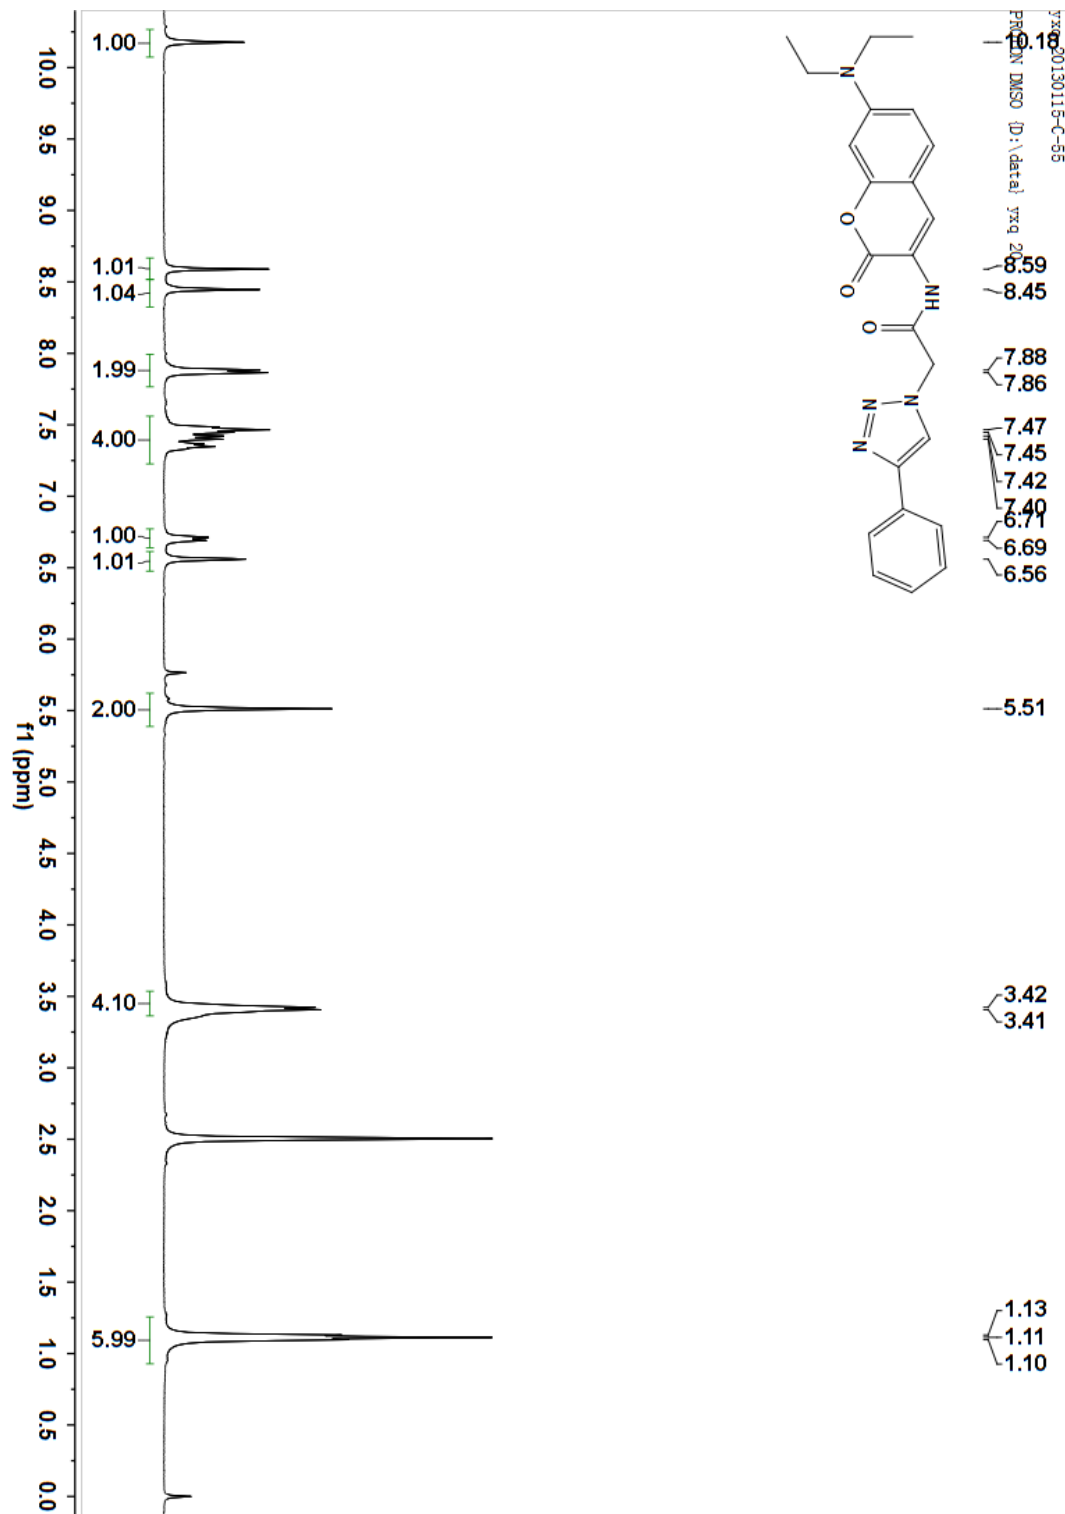

<sup>13</sup>C-NMR Spectrum of **PS-2** in DMSO-d<sub>6</sub> (100 MHz):

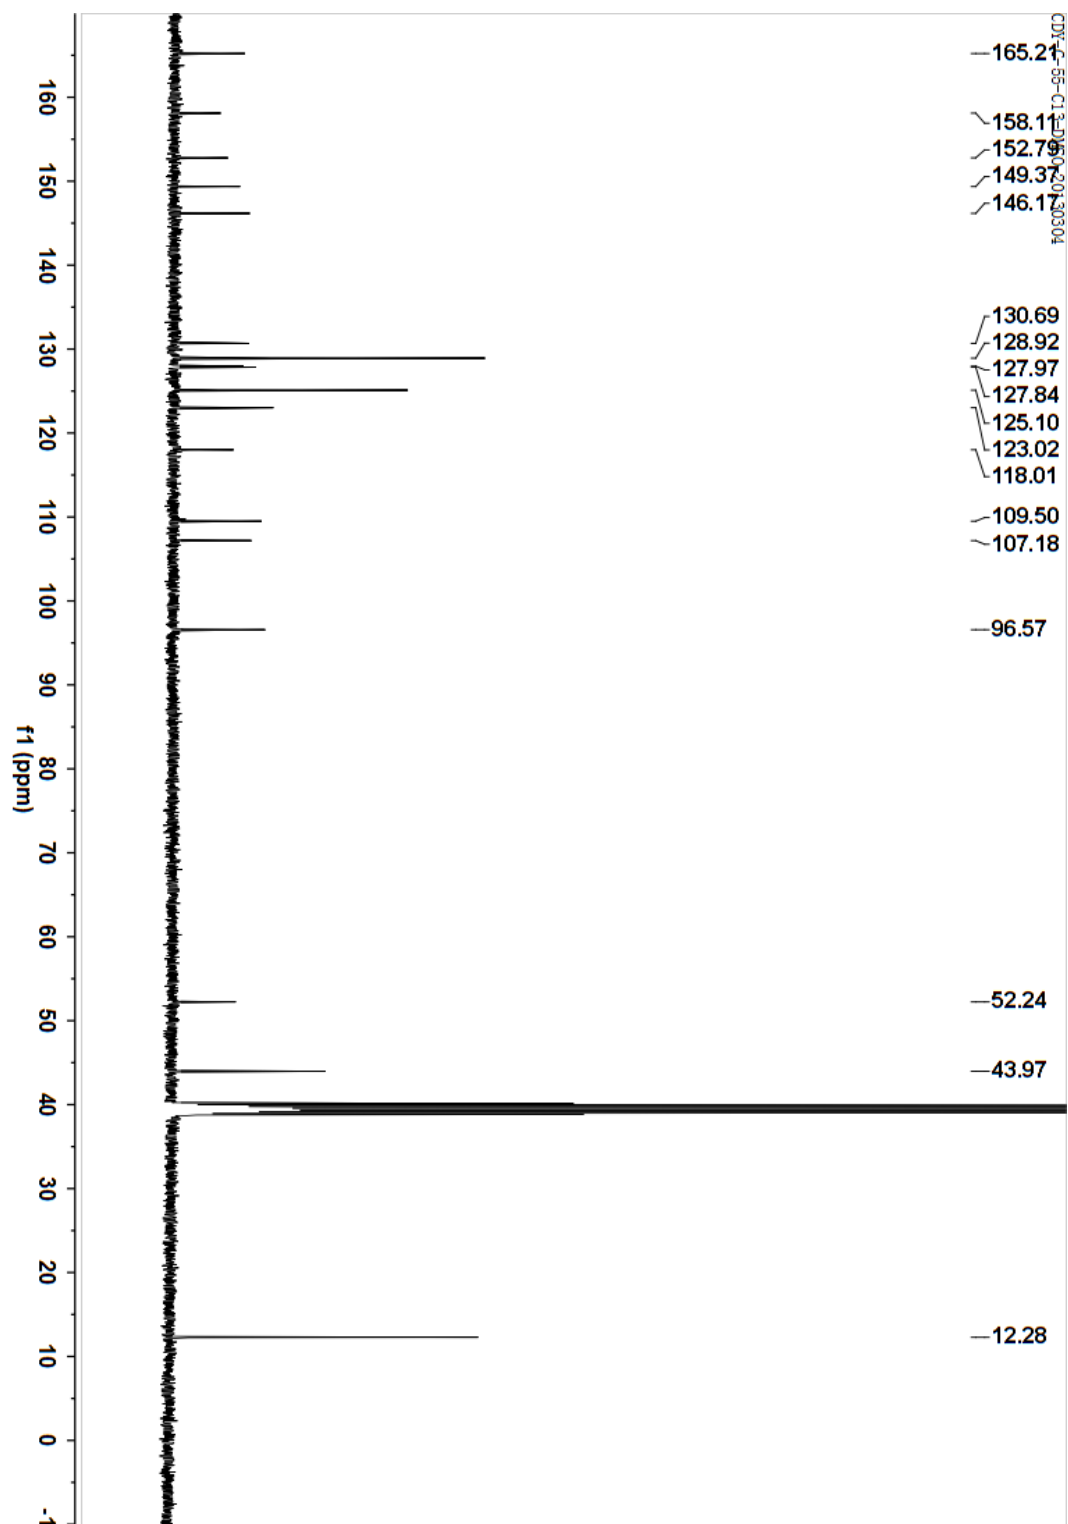

<sup>1</sup>H-NMR Spectrum of A-2 in CDCl<sub>3</sub> (400 MHz):

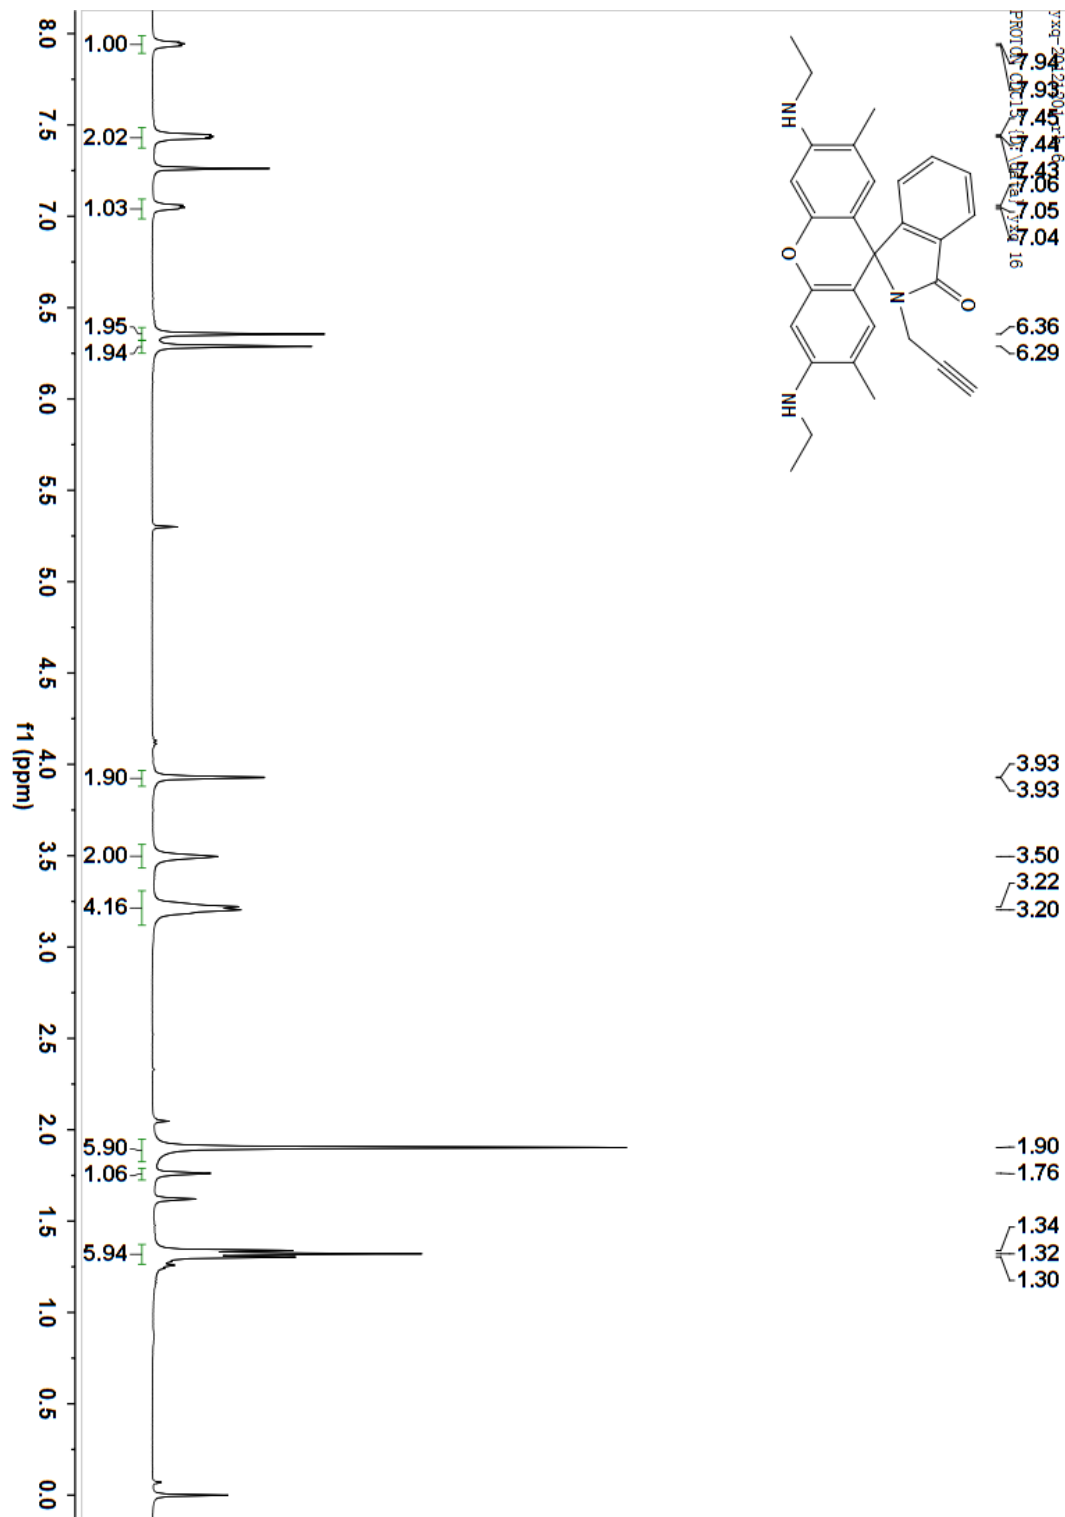



$^1\text{H-NMR}$  Spectrum of **PS-3** in  $\text{CDCl}_3$  (400 MHz):

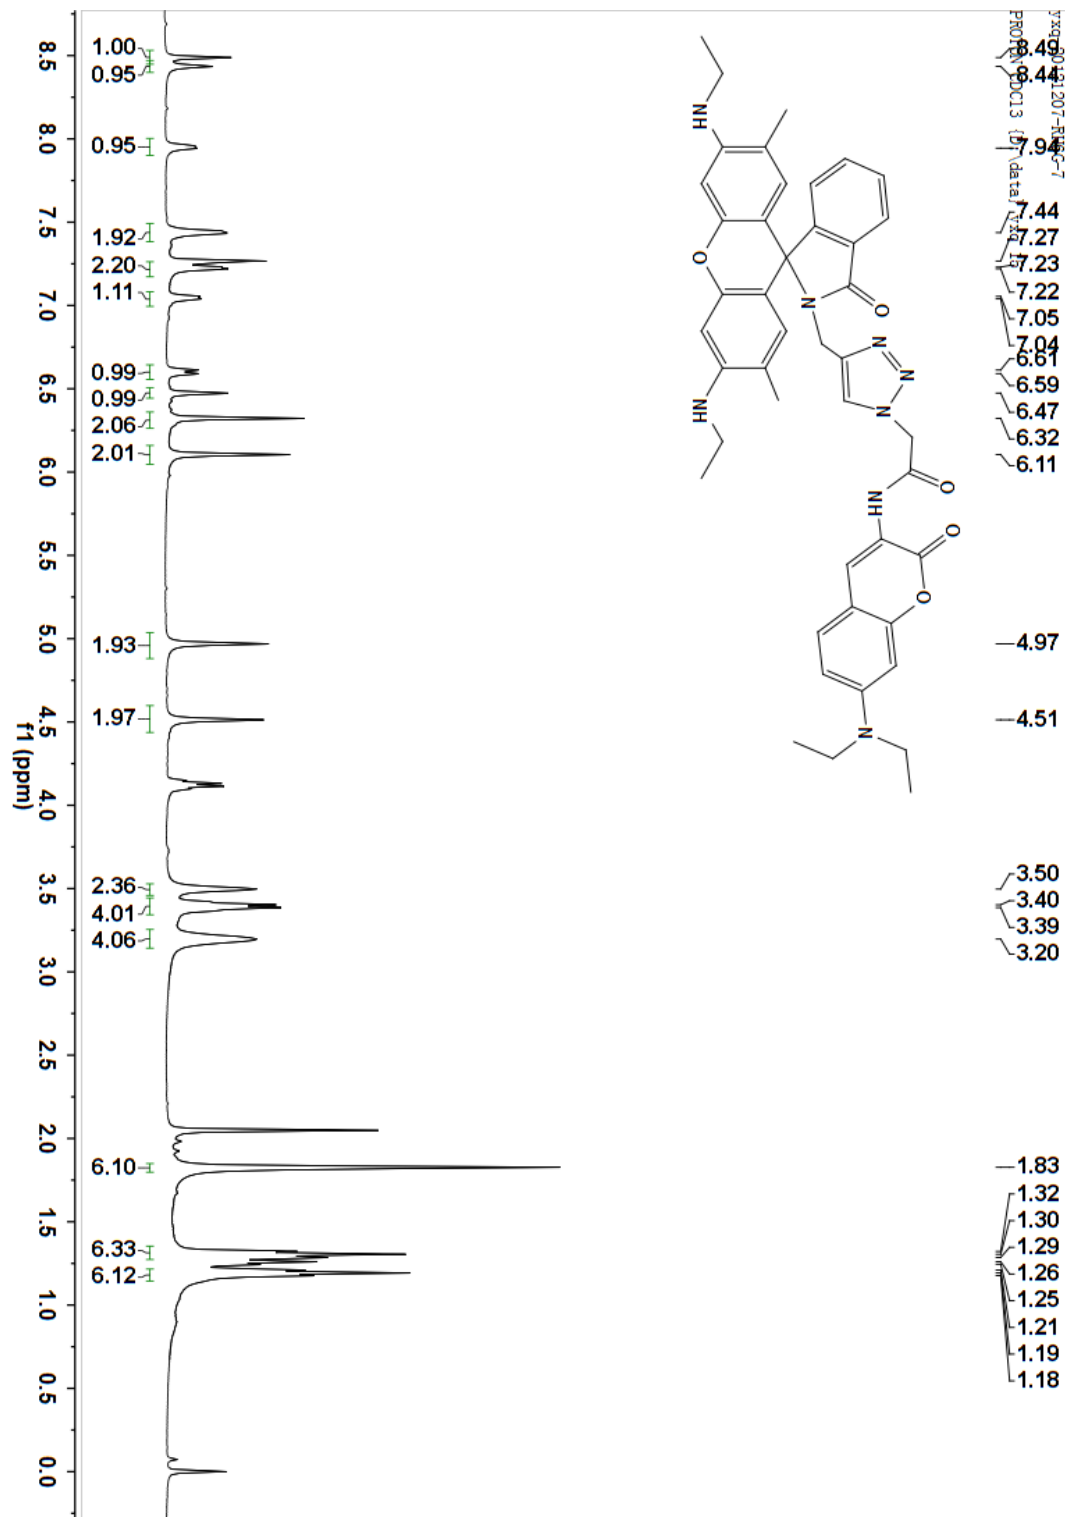

$^{13}\text{C}$ -NMR Spectrum of PS-3 in  $\text{CDCl}_3$  (100 MHz):

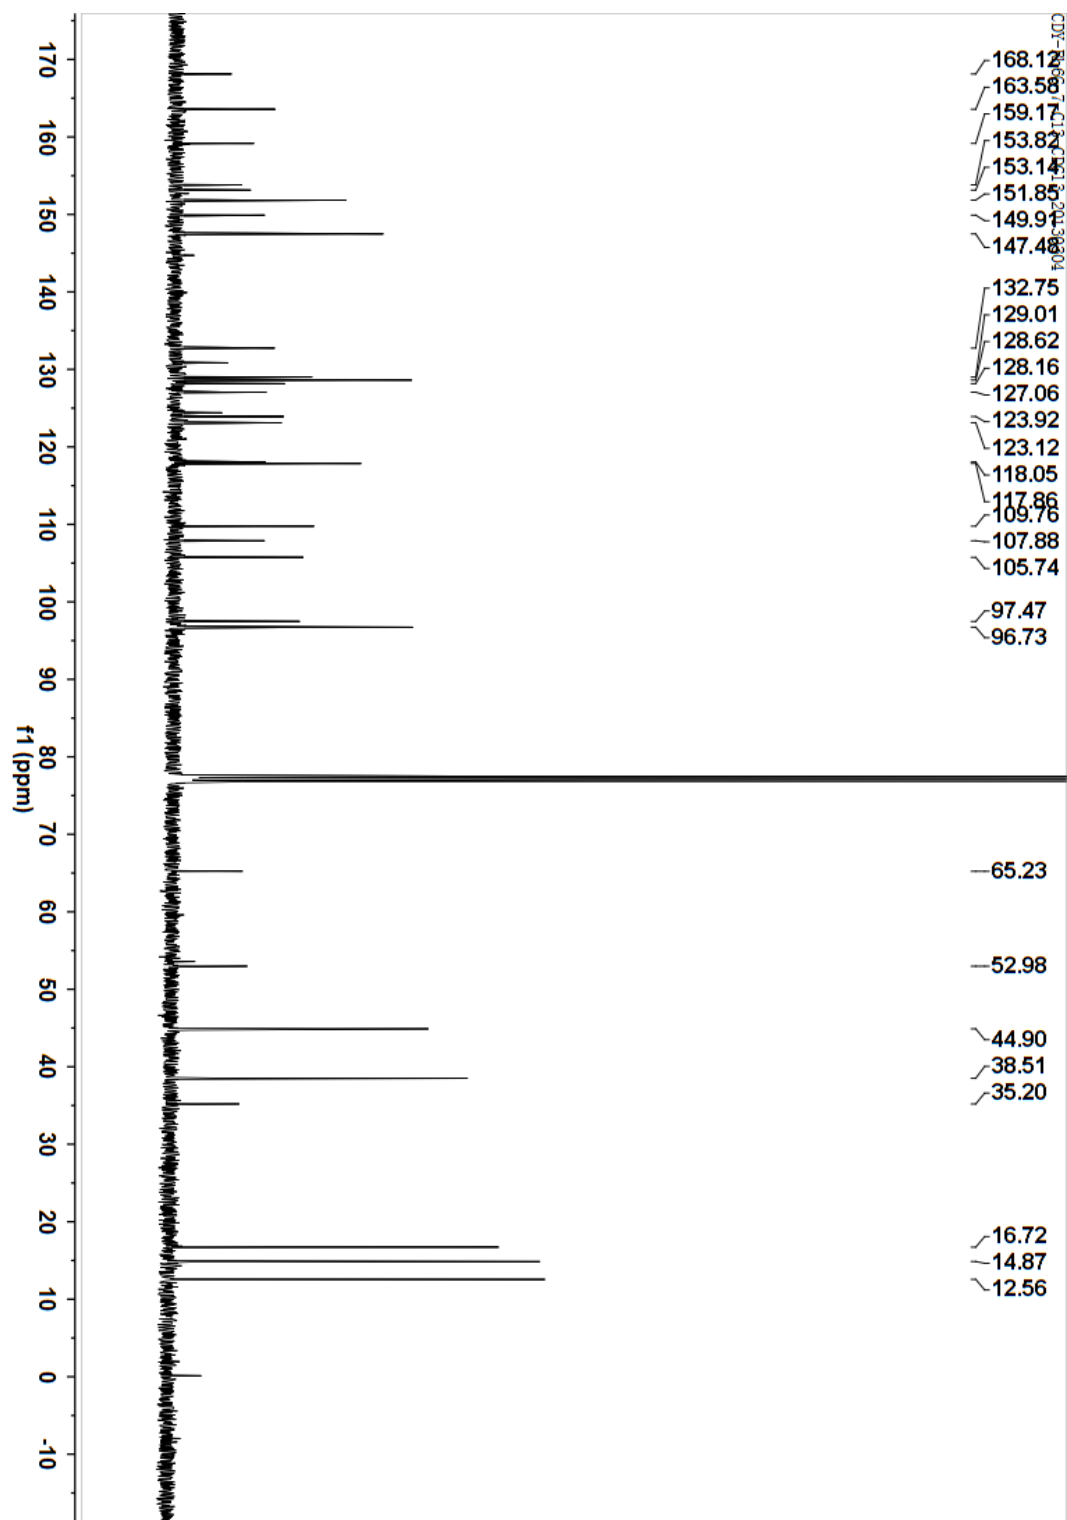

HRMS spectra of **C-2**

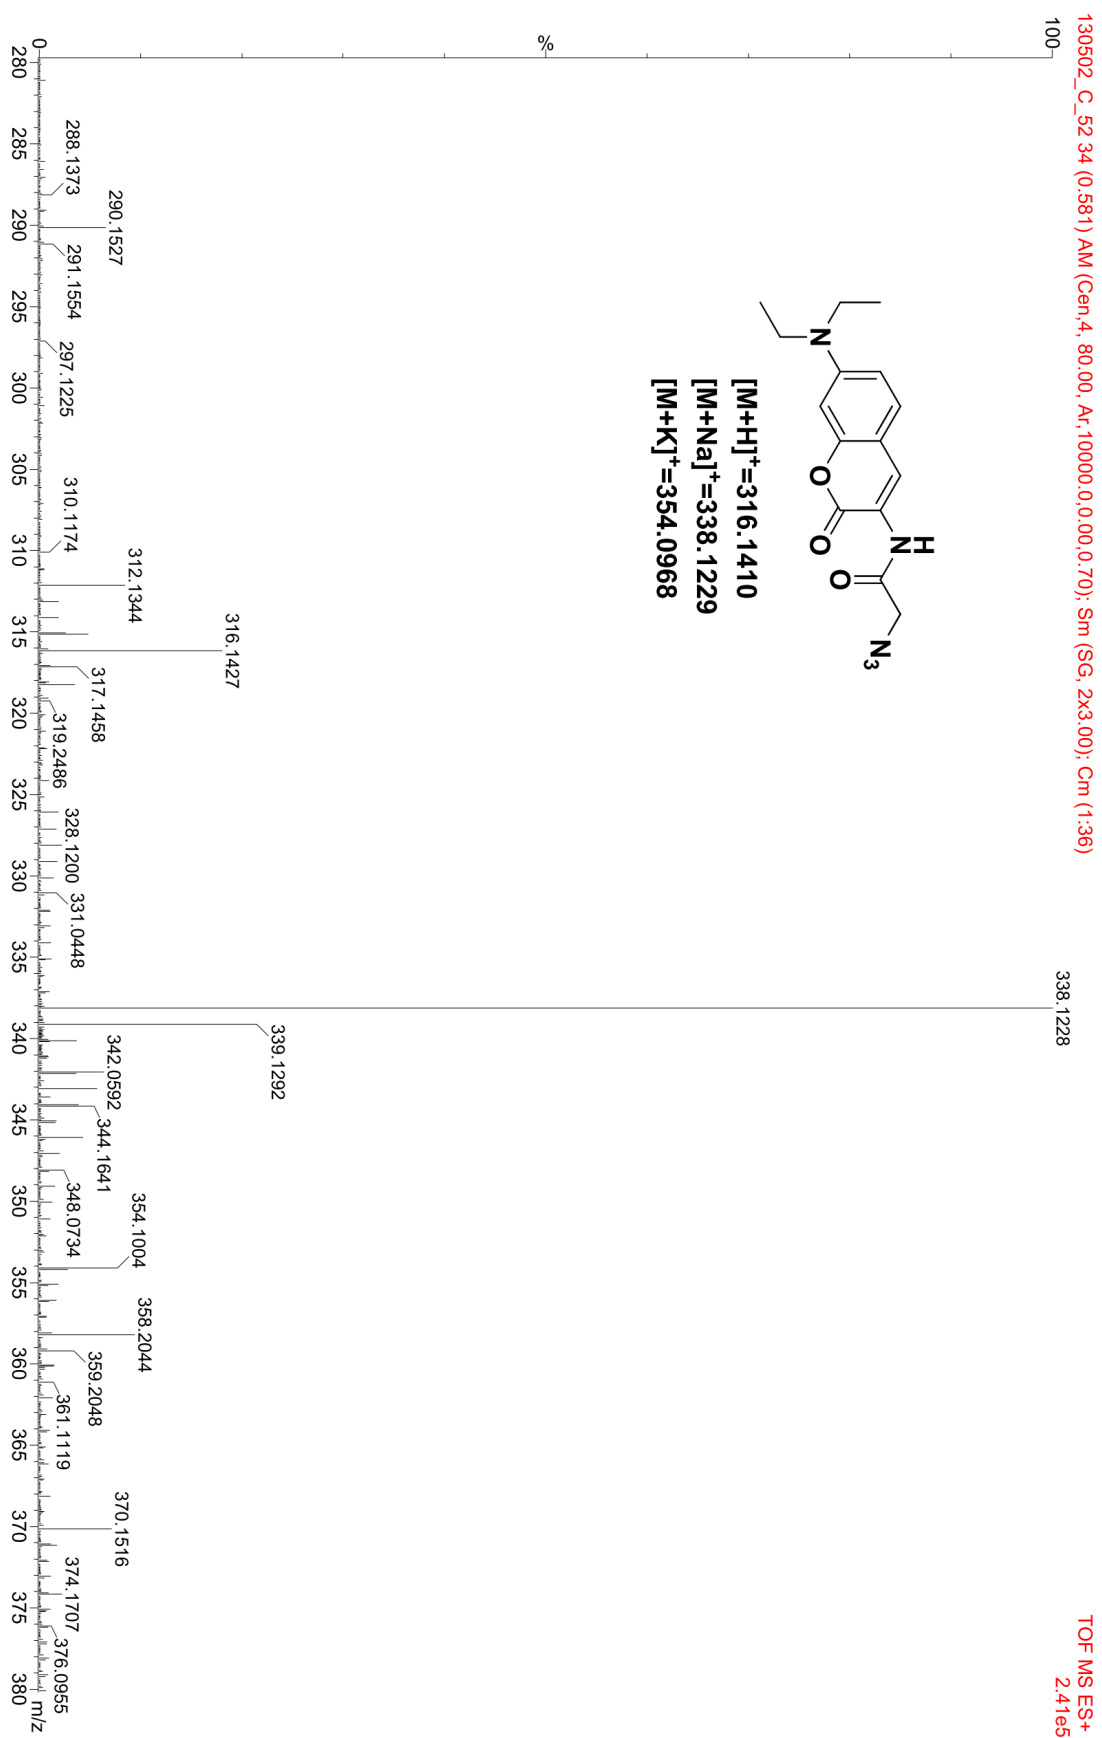

HRMS spectra of PS-1

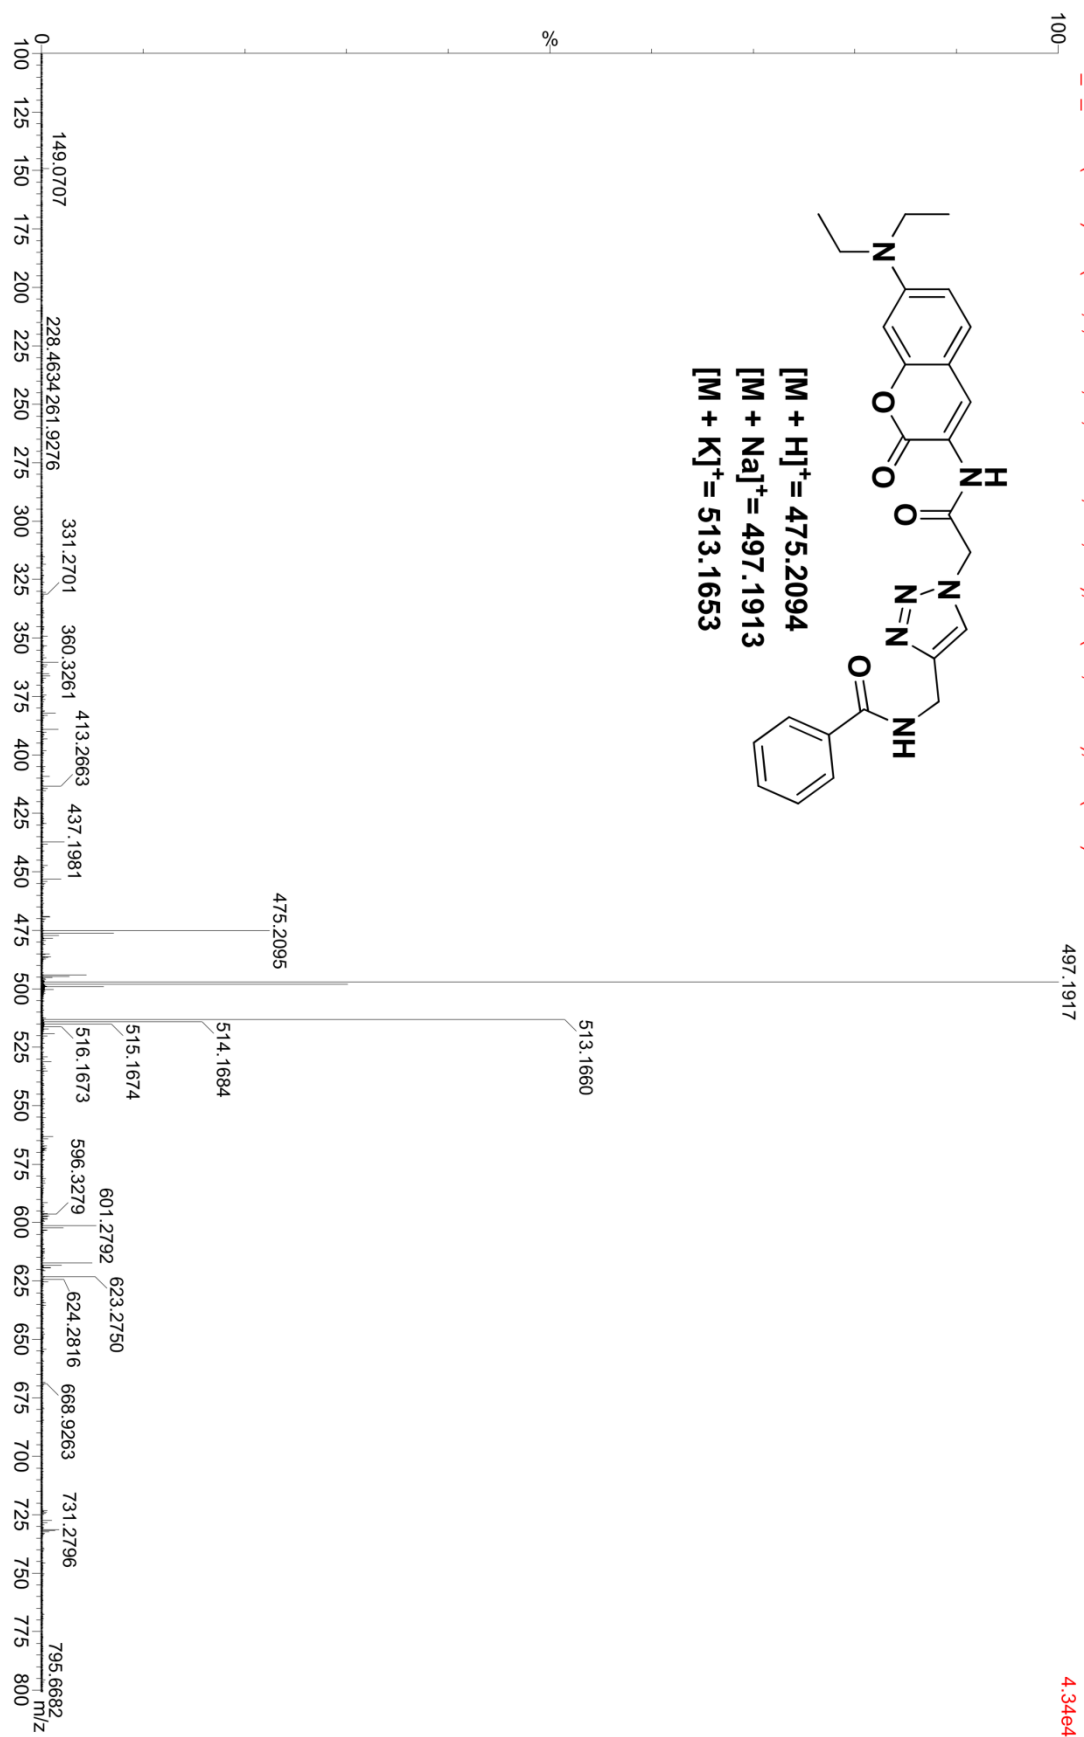

HRMS spectra of PS-2

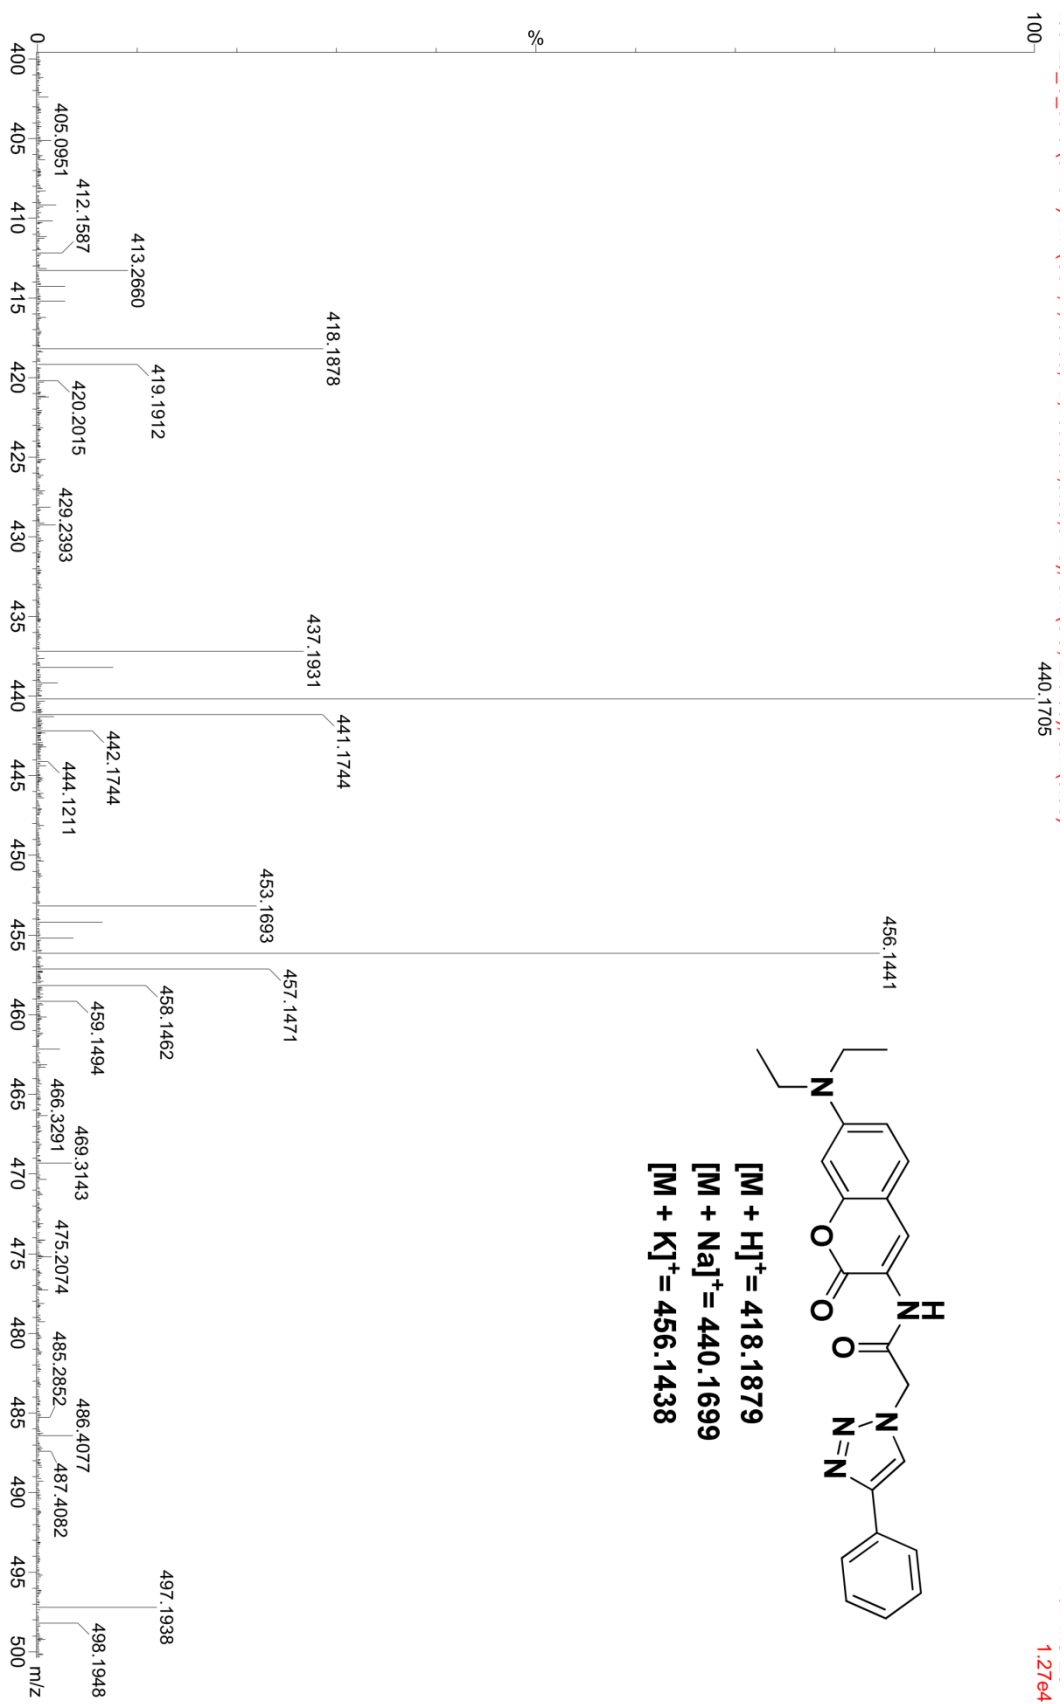

HRMS spectra of PS-3

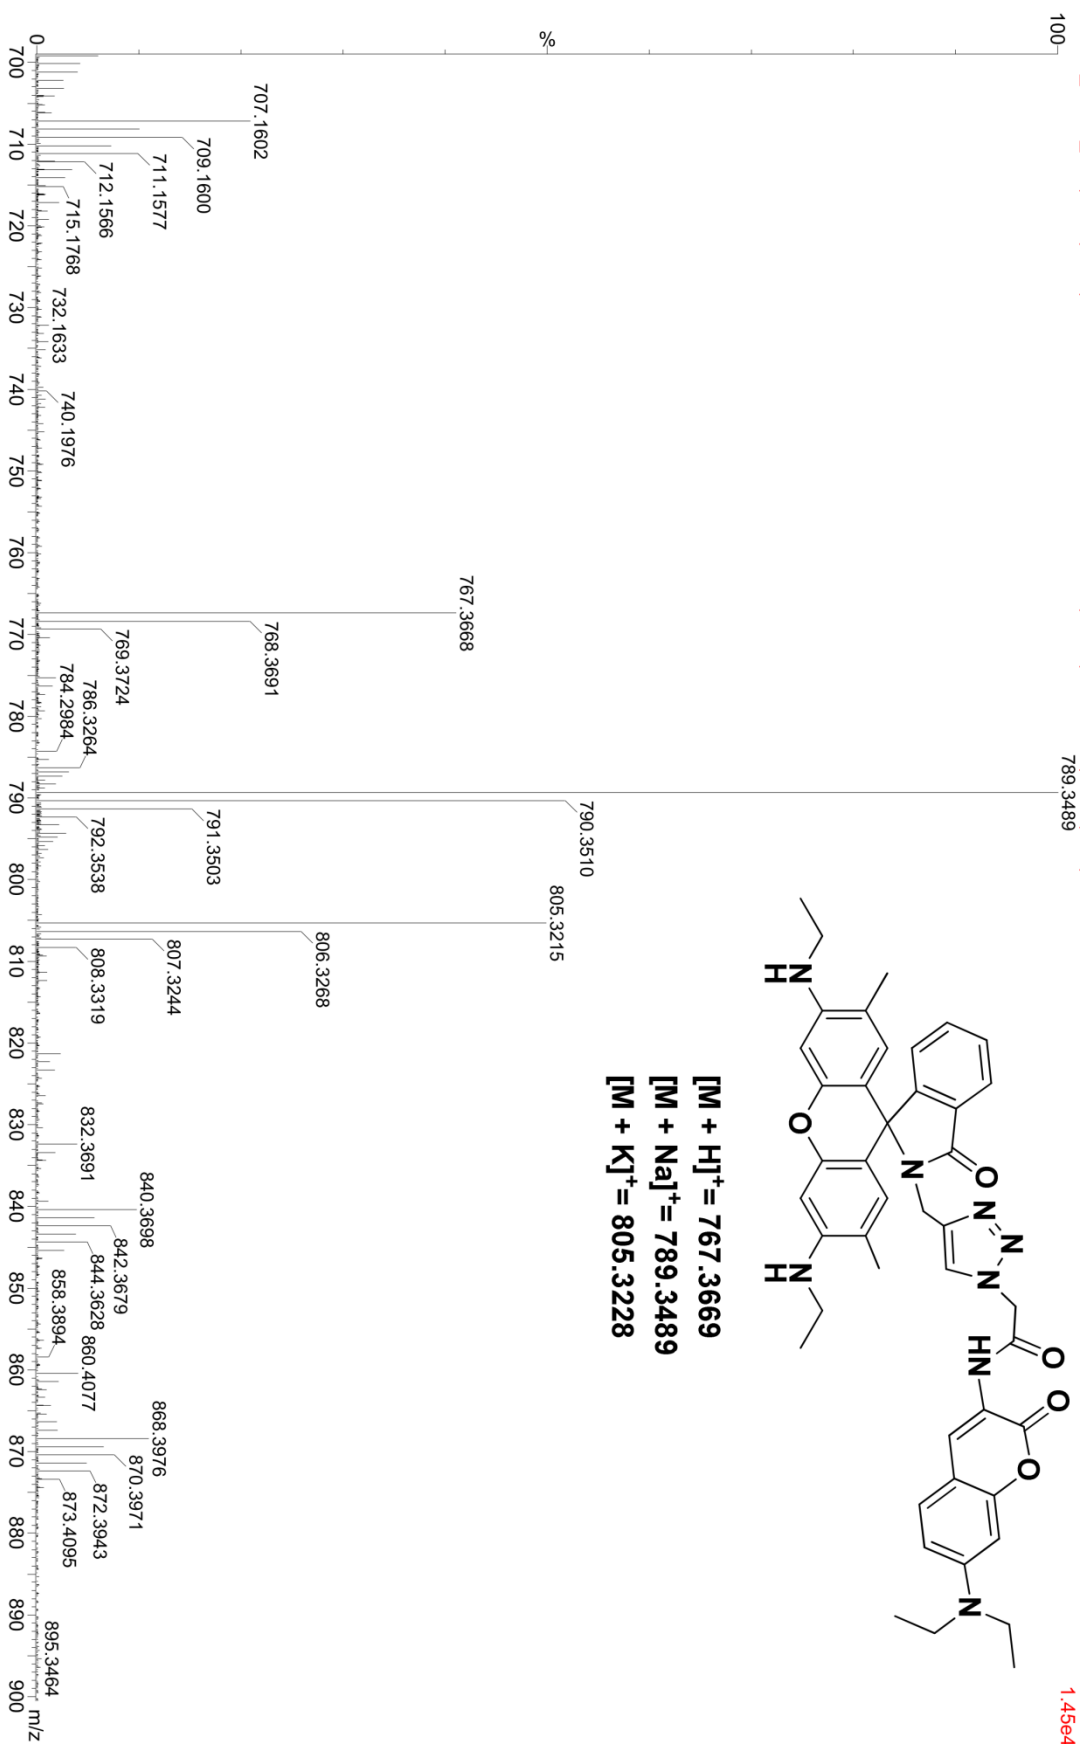

Supplement: c3an01183f.pdf [file c3an01183f.pdf]
